# Supplementary material for: The visual word form area (VWFA) is part of both language and attention circuitry
Source: PubMed Central journal article supplement (PMC6898452; doi:10.1038/s41467-019-13634-z), 2019-12-06
Supplement: 41467_2019_13634_MOESM1_ESM.pdf [file 41467_2019_13634_MOESM1_ESM.pdf]

1 **Supplementary Information**

2  
3 **The visual word form area (VWFA) is part of both language and attention**  
4 **circuity**

5  
6  
7 *Lang Chen et al.*  
8  
9

10 **List of Contents**

11 *Supplementary Methods*

12  
13 *Supplementary Discussions*

14  
15 *Supplementary Figures S1-3*

16  
17 *Supplementary Tables S1-15*

18  
19 *Supplementary Reference*  
20  
21  
22

## Supplemental Methods

### Description of the open-source fMRI datasets

Two datasets were acquired from OpenNeuro to assess task-based activation of vOT and connectivity between VWFA and language and attention networks using the same ROIs employed in our structural and intrinsic functional analyses. We chose these two datasets because: (i) they enabled us to test specific hypotheses regarding differential patterns of connectivity between VWFA and nodes of the language and attention networks during distinct cognitive processes, including word reading and visuospatial attention; (ii) the age range of the participants is comparable to the HCP dataset used for the intrinsic functional and structural connectivity analyses; and (iii) these two studies employed relatively simple task design, which enabled standard contrasts for VWFA task connectivity analysis.

**Dataset 1: Word Reading Task.** (<https://openneuro.org/datasets/ds000003/versions/00001>). This dataset was collected from 13 participants (8 males; age range: 18-38 years old) using a block design. Each subject completed a rhyme judgement task with visually-presented words in the scanner. There was a total of 4 runs with words and 4 runs with pseudowords which were interleaved with 7 rest runs. The duration of each run was 5 minutes 20 seconds. In each task run, a total of 8 stimuli were presented, and each word or pseudoword was displayed for 2 seconds with a 0.5 second interval between trials. Details of the data acquisition parameters listed in OpenNeuro were limited, however the TR = 2 sec. This dataset was submitted by G., Xue, and R. A., Poldrack and was supported by the OpenfMRI project and NSF Grant (OCI-1131441) to R. Poldrack. No previous publications were associated with this dataset.

**Dataset 2: Visual Flanker Task.** (<https://openneuro.org/datasets/ds000102/versions/00001>). This dataset was collected from 26 participants (16 males; age range: 19.65 – 49.79 years old) using an event-related design. Each participants performed two 5-minute blocks, each containing 12 congruent and 12 incongruent trials, presented in a pseudorandom order. On each trial, participants used one of two buttons on a response pad to indicate the direction of a central arrow in an array of 5 arrows. In congruent trials the flanking arrows pointed in the same direction as the central arrow (e.g., <<<<<), while in more demanding incongruent trials the flanking arrows pointed in the opposite direction (e.g., <<><<). The stimuli was displayed for 1.5 seconds, and the inter-trial interval (ITI) varied between 8 s and 14 s (mean ITI=12 s). Functional imaging data were acquired using a research dedicated Siemens Allegra 3.0 T scanner, with a standard Siemens head coil, located at the NYU Center for Brain Imaging. 146 contiguous, whole-brain functional volumes were acquired using an echo planar imaging (EPI) sequence (TR=2000 ms; TE=30 ms; flip angle=80, 40 slices, matrix=64x64; FOV=192 mm; acquisition voxel size=3x3x4mm) during each of the two flanker task blocks. Additional details of this dataset have been published previously<sup>1-3</sup>.

### fMRI data preprocessing and analysis

**Preprocessing:** Data were analyzed using a general linear model implemented in the Statistical Parametric Mapping program (SPM12<sup>4</sup>; Wellcome Trust Centre for Neuroimaging, London, United Kingdom). Images were realigned to correct for movement, denoised, spatially

67 normalized to Montreal Neurological Institute (MNI) space, and smoothed with an effective  
68 Gaussian kernel of 6 mm.

69 Voxelwise analysis of fMRI activation: Task-related brain activation in the block-design data  
70 from Dataset 1 and the event-related design data from Dataset 2 were first modeled at the  
71 individual subject level using the general linear model (GLM) implemented in SPM12.  
72 Interpolated volumes flagged at the preprocessing stage were deweighted in the individual  
73 subject analysis. For Dataset 1, voxel-wise t-statistics maps contrasting the task blocks to the rest  
74 blocks (i.e., [word – rest] and [pseudoword – rest] contrasts) were generated for each participant.  
75 For Dataset 2, trials associated with correct responses were isolated from those associated with  
76 incorrect response, and individual-level activation maps were generated for [correct congruent –  
77 rest] and [correct incongruent – rest] contrasts. At the group level, our analysis focused on the  
78 [word – rest] conditions for Dataset 1 (reading) given our specific interest in activity profiles  
79 during word reading. For Dataset 2 (flanker), our group-level analysis focused on the [correct  
80 incongruent – rest] condition to enable a focus on activity profiles during a challenging  
81 visuospatial attention processing task. We corrected for multiple comparisons at the cluster level  
82 by using Monte Carlo simulations implemented in Matlab. Consistent with recent  
83 recommendations for reporting fMRI activation<sup>5</sup>, we used a conservative height threshold  $p$   
84  $< .001$  with a cluster extent threshold of 41 voxels ( $p < .01$ ).

85 Functional connectivity analysis: We used a generalized form of Psychophysiological Interaction  
86 (gPPI)<sup>6</sup> as implemented in the “Generalized Form of Context-Dependent Psychophysiological  
87 Interactions” SPM toolbox. Consistent with intrinsic functional and structural connectivity  
88 analyses, a 6-mm sphere centered at (-45, -57, -12) served as the VWFA seed for the functional  
89 connectivity analysis. All target ROIs in the language and attention networks were identical to  
90 those used in the intrinsic functional and structural connectivity analyses (**Table S3**). At the  
91 individual participant level, we included: (i) regressors for the psychological variables (e.g., in  
92 Dataset 1, two conditions: word and pseudoword); (ii) one regressor for the physiological  
93 variable (i.e., the time course of the seed region VWFA); and (iii) regressors for the  
94 psychophysiological interaction term (i.e., the cross-product of each psychological variable with  
95 the seed region time course). Movement parameters (x, y, z, roll, pitch, yaw) and a constant term  
96 were also included in the model.

97 Contrast images corresponding to PPI effects (i.e., the [word – rest] contrast in Dataset 1 and the  
98 [correct incongruent – rest] contrast in Dataset 2) at the individual level were then entered into a  
99 group level statistical analysis. Consistent with the voxelwise analysis of fMRI activation,  
100 whole-brain gPPI results were thresholded at a height threshold of  $p < .001$  with a cluster extent  
101 threshold of 41 voxels ( $p < .01$ ).

102 The ROI-based analysis was based on the seed-ROI matrix for each participant. At the individual  
103 level, the off-diagonal values were averaged for each pair of links (e.g., the VWFA-IFG and  
104 IFG-VWFA link values were averaged), and then a one-sample t-test against a mean of zero was  
105 used to infer whether there is a significant seed-ROI functional connectivity across the sample.  
106 We applied FDR correction on the p-values to correct for multiple comparison. This process was  
107 performed separately for Datasets 1 and 2 to examine the VWFA functional connectivity to  
108 language and attention networks during the word reading and flanker tasks.

109

## 110 **Supplementary Discussions**

### 111 ***VWFA is engaged by both word reading and visuospatial attention tasks***

112 Group results from the voxelwise analysis of fMRI activation for the [word – rest] contrast from  
113 the reading task revealed significant activation in several key regions implicated in word  
114 reading<sup>7-9</sup> including VWFA and posterior FG of ventral occipital cortex, as well as inferior  
115 frontal gyrus (IFG) and superior temporal gyrus (STG; Figure S2, green). Additionally, word  
116 reading elicited significant activation in bilateral IPS/IPL. Group results for the [correct  
117 incongruent – rest] contrast from the visuospatial attention task revealed activation of the  
118 frontoparietal attention network<sup>10-12</sup>, including dorsolateral PFC, SPL, and IPS (Figure S2, red).  
119 Significant activation for this contrast was also evident in ventral occipital regions, including  
120 VWFA and pFG. Importantly, voxelwise analysis of fMRI activation showed extensive overlap  
121 between word reading and visuospatial attention tasks in ventral occipital regions, including the  
122 VWFA region that was used for seed-based structural and intrinsic functional connectivity  
123 analyses (purple) and bilateral pFG (yellow). These findings are consistent with previous reports  
124 showing VWFA activation for a broad range of visual tasks<sup>13-15</sup> and highlight the functional  
125 significance for the precise VWFA region that formed the basis for our structural and intrinsic  
126 functional analyses.

### 127 ***VWFA is functionally connected to both language and attention networks during rhyming and*** 128 ***visuospatial attention tasks***

129 Consistent with the multiplex model of VWFA function, ROI-based functional connectivity  
130 analysis revealed significant connectivity between VWFA and both language and attention  
131 networks during word reading and visuospatial attention tasks. Specifically, gPPI results for the  
132 [word – rest] contrast of the word reading task showed significant connectivity between the  
133 VWFA and key nodes of the language network, including left-hemisphere IFG, SMG, mSTS,  
134 and pSTS (Table S12). Moreover, gPPI results for this contrast revealed significant connectivity  
135 between VWFA and nodes of the frontoparietal attention network, including left-hemisphere  
136 anterior and posterior IPS and MT+.

137 gPPI results for the [correct incongruent – rest] contrast of the flanker task showed significant  
138 connectivity between VWFA and nodes of all nodes of the frontoparietal attention network,  
139 including left-hemisphere FEF, anterior and posterior IPS, and MT+ (Table S13). However,  
140 interestingly and surprisingly, we also observed significant task-based functional connectivity  
141 between VWFA and the language network during this visuospatial attention task, including IFG,  
142 SMG, aSTS, and mSTS.

143 Taken together, results from task-based functional connectivity analyses reveal that: (1) the  
144 VWFA was strongly activated during both word reading and flanker attention tasks; (2) VWFA  
145 task-based functional connectivity increased to: (a) language network nodes, including IFG, STS,  
146 as well as attention network nodes, including FEF and IPS, during the reading task and (b)  
147 visuospatial attention network nodes during the visuospatial attention tasks. Importantly, task-  
148 based functional connectivity results show strong convergence with our structural and intrinsic  
149 functional connectivity results and are consistent with the multiplex model of VWFA function.

150

151

152 **Supplementary Figures S1-3**

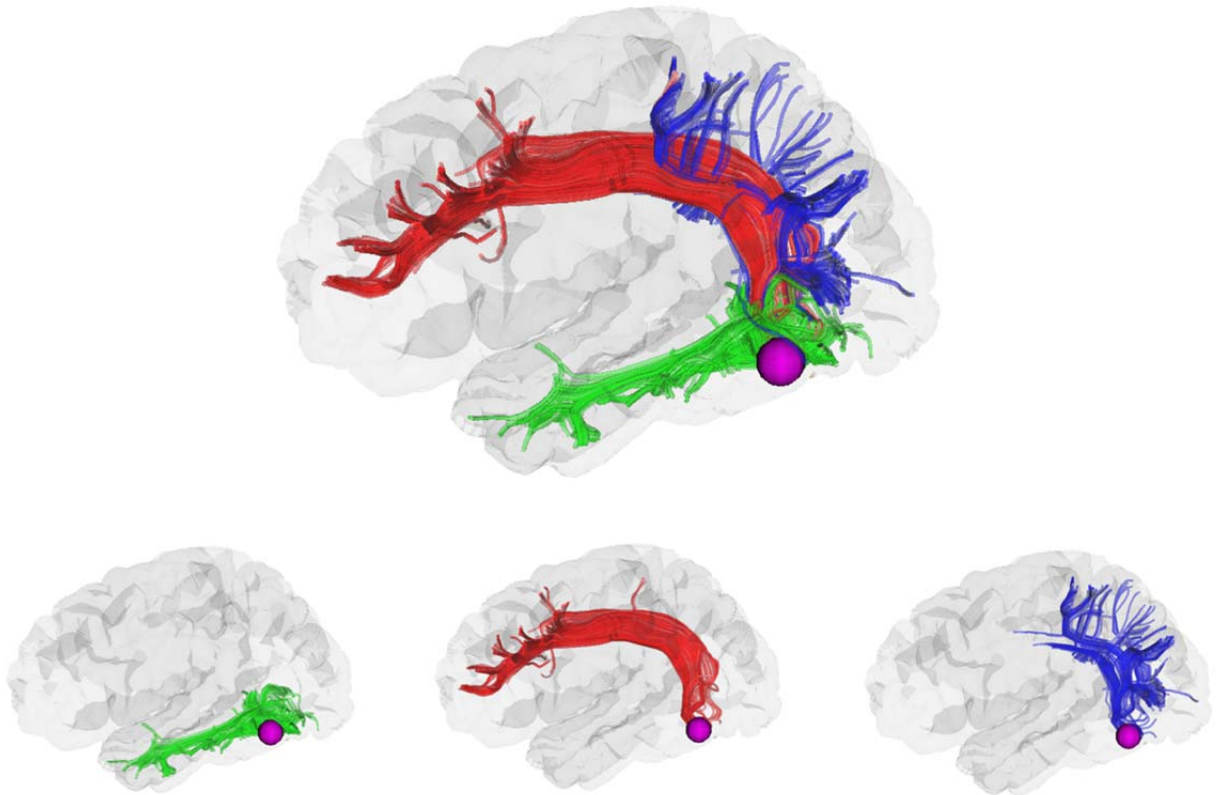

153

154

155

156

157

158

**Supplementary Figure 1.** Illustration of white-matter streamlined tracts from the VWFA ROI (shown in purple) in a single subject. Green: inferior longitudinal fasciculus (ILF); Red: superior longitudinal fasciculus (SLF); Blue: vertical occipital fasciculus/temporal-parietal-superior parietal lobule (vOF/TP-SPL)<sup>16,17</sup>.

159

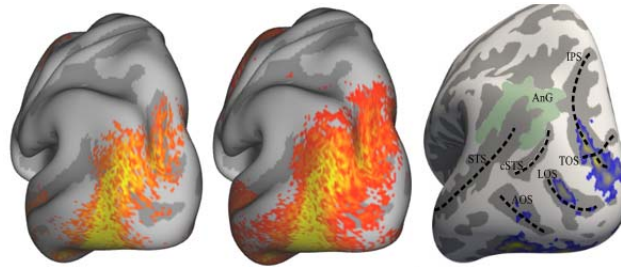

160  
161

162 **Supplementary Figure 2.** Similarity between vOF/TP-SPL tracts identified in our structural  
163 connectivity analysis and the Yeatman's study<sup>16</sup>. *Left:* VWFA connectivity from the present  
164 study ( $p < 10^{-15}$ ). *Middle:* VWFA connectivity from the present study with a less conservative  
165 threshold ( $p < 10^{-5}$ ), which shows structural connectivity with a larger extent of the IPS. *Right:*  
166 vOF terminations reproduced from Yeatman et al. The overlap is strongest in the posterior  
167 aspects of the IPS. Importantly, our HCP-derived VWFA tracts extend more dorsally and  
168 anteriorly along the IPS than the vOF<sup>16</sup> consistent with TP-SPL tracts linking inferior temporal  
169 and superior parietal cortices<sup>17</sup>.

170

171

172  
173  
174

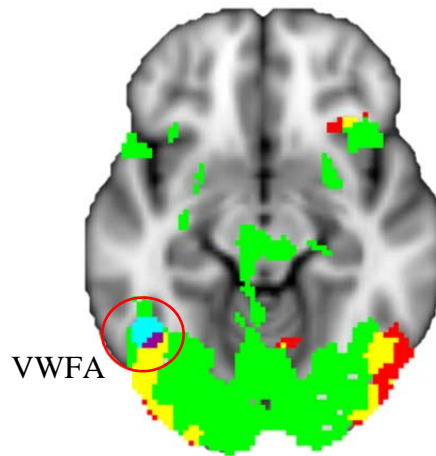

175 **Supplementary Figure 3.** Overlapping activations in VWFA for rhyming (green) and flanker  
176 (red) tasks. The binarized group-averaged activation maps were created for the reading (word vs.  
177 rest) and flanker (correct-incongruent vs. rest) tasks separately from Datasets 1 and 2,  
178 respectively (height:  $p < .001$ ; cluster size = 41 voxels,  $p < .01$ ). The spherical VWFA seed used  
179 in the structural and intrinsic functional connectivity analyses is plotted in cyan, and the three-  
180 way overlap of the two task activation maps and the VWFA seed is plotted in purple with peak at  
181 MNI coordinates at (-45, -57, -12). Additional overlap between these two functional tasks  
182 extended beyond VWFA (yellow), encompassing bilateral posterior fusiform gyrus (pFG).  
183

184 **Supplementary Tables S1-15**

185

186 **Supplementary Table 1. Demographic, cognitive and movement measures.**

|                           | Mean   | SD    | Range          |
|---------------------------|--------|-------|----------------|
| <b>Demographic</b>        |        |       |                |
| Age (Years)               | 29.96  | 2.65  | 26 - 35        |
| Handedness                | 80.99  | 18.27 | 5 - 100        |
| <b>Cognitive Tests</b>    |        |       |                |
| Flanker                   | 102.13 | 10.11 | 72.81 - 122.31 |
| Word Reading              | 108.35 | 14.19 | 60.11 - 138.00 |
| Picture Vocabulary        | 111.62 | 14.56 | 68.72 - 153.09 |
| <b>Scan movement</b>      |        |       |                |
| Mean Displacement (mm)    | 0.09   | 0.02  | 0.05 - 0.19    |
| Rotation Range X (Degree) | 0.88   | 0.55  | 0.14 - 3.19    |
| Rotation Range Y (Degree) | 0.57   | 0.34  | 0.10 - 1.97    |
| Rotation Range Z (Degree) | 0.52   | 0.31  | 0.11 - 2.31    |
| Translation Range X (mm)  | 0.54   | 0.19  | 0.17 - 0.99    |
| Translation Range Y (mm)  | 0.34   | 0.17  | 0.10 - 0.91    |
| Translation Range Z (mm)  | 0.66   | 0.19  | 0.20 - 1.00    |

187

188



189 **Supplementary Table 2.** Correlation matrix.

|                             | 1       | 2     | 3      | 4       | 5       | 6       | 7       | 8       | 9       | 10      | 11      |
|-----------------------------|---------|-------|--------|---------|---------|---------|---------|---------|---------|---------|---------|
| 1 Age                       | -       |       |        |         |         |         |         |         |         |         |         |
| 2 Handedness                | 0.08    | -     |        |         |         |         |         |         |         |         |         |
| 3 Flanker                   | 0.01    | -0.04 | -      |         |         |         |         |         |         |         |         |
| 4 Word Reading              | -0.16** | 0.13* | 0.16** | -       |         |         |         |         |         |         |         |
| 5 Picture Vocabulary        | -0.18** | 0.13* | 0.17** | 0.66*** | -       |         |         |         |         |         |         |
| 6 Mean Displacement (mm)    | 0.07    | 0.06  | -0.06  | -0.2*** | -0.15** | -       |         |         |         |         |         |
| 7 Rotation Range X (Degree) | 0.09    | -0.01 | -0.03  | -0.02   | -0.04   | -0.01   | -       |         |         |         |         |
| 8 Rotation Range Y (Degree) | 0.04    | 0.03  | -0.01  | 0       | -0.05   | 0.02    | 0.31*** | -       |         |         |         |
| 9 Rotation Range Z (Degree) | 0.1#    | -0.01 | -0.04  | 0.03    | -0.03   | -0.08   | 0.38*** | 0.24*** | -       |         |         |
| 10 Translation Range x (mm) | 0.16**  | -0.04 | 0.00   | -0.04   | -0.03   | 0.34*** | 0.2***  | 0.23*** | 0.54*** | -       |         |
| 11 Translation Range y (mm) | 0.08    | -0.04 | 0.04   | -0.09   | -0.05   | 0.03    | 0.49*** | 0.25*** | 0.36*** | 0.20*** | -       |
| 12 Translation Range z (mm) | 0.01    | 0.00  | -0.07  | -0.12*  | -0.06   | 0.22*** | 0.25*** | 0.21*** | 0.19*** | 0.31*** | 0.19*** |

190

191 *Notes:* \* < .05; \*\* < .01; \*\*\* < .001; # < .10.

192 **Supplementary Table 3.** Beta values of structural connectivity of VWFA with target ROIs.

|                                                | Coordinates (MNI) | Mean   | SD                          | One-sample test<br>t-value | Effect Size<br>(Cohen's d) |
|------------------------------------------------|-------------------|--------|-----------------------------|----------------------------|----------------------------|
| <b>Language ROIs</b>                           |                   |        |                             |                            |                            |
| Vogel et al. (2012)                            |                   |        |                             |                            |                            |
| Left AG                                        | (-49,-57,28)      | 0.0047 | 0.0086                      | 1.4336                     | 0.0810                     |
| Left SMG                                       | (-56,-43,31)      | 0.0004 | 0.0007                      | -98.1536***                | -5.5480                    |
| Left IFG                                       | (-53,27,16)       | 0.0011 | 0.0045                      | -11.1896***                | -0.6325                    |
| Left ITG                                       | (-61,-33,-15)     | 0.0082 | 0.0125                      | 5.8814***                  | 0.3324                     |
| STS ROIs from Neurosynth                       |                   |        |                             |                            |                            |
| Left aSTS                                      | (-54,9,-20)       | 0.0075 | 0.0130                      | 4.6933***                  | 0.2653                     |
| Left mSTS                                      | (-53,-18,-10)     | 0.0224 | 0.0248                      | 13.0629***                 | 0.7384                     |
| Left pSTS                                      | (-52,-40,5)       | 0.0048 | 0.0076                      | 1.7982#                    | 0.1016                     |
| <b>Attention ROIs</b>                          |                   |        |                             |                            |                            |
| Vogel et al. (2012)                            |                   |        |                             |                            |                            |
| Left FEF                                       | (-26,-5,50)       | 0.0117 | 0.0189                      | 7.2079***                  | 0.4074                     |
| Left MT+                                       | (-45,-71,-1)      | 0.1672 | 0.0642                      | 44.9684***                 | 2.5418                     |
| Left aIPS                                      | (-25,-62,51)      | 0.0072 | 0.0111                      | 5.0934***                  | 0.2879                     |
| Left pIPS                                      | (-25,-69,34)      | 0.0352 | 0.0336                      | 16.4408***                 | 0.9293                     |
| Swisher et al., (2007)                         |                   |        |                             |                            |                            |
| IPS1                                           |                   | 0.0156 | 0.0223                      | 9.2112***                  | 0.5207                     |
| IPS2                                           |                   | 0.0092 | 0.0155                      | 5.8661***                  | 0.3316                     |
| IPS3                                           |                   | 0.0045 | 0.0089                      | 0.9958                     | 0.0563                     |
| IPS4                                           |                   | 0.0014 | 0.0032                      | -14.6578***                | -0.8285                    |
| Network Comparison<br>(Language vs. Attention) |                   |        | $t(312) = -30.54, p < .001$ |                            |                            |

193  
 194 *Notes:* \*\*\* suggests that the beta values of connectivity link were significant by the one-sample t  
 195 test against the empirically derived median value (0.00402) at the level of  $p < .001$ .  
 196

197 **Supplementary Table 4.** Beta values of resting-state functional connectivity of VWFA with  
 198 target ROIs.

|                                                | Coordinates (MNI) | Mean                        | SD     | One-sample test<br>t-value | Effect Size<br>(Cohen's d) |
|------------------------------------------------|-------------------|-----------------------------|--------|----------------------------|----------------------------|
| <b>Language ROIs</b>                           |                   |                             |        |                            |                            |
| Vogel et al. (2012)                            |                   |                             |        |                            |                            |
| Left AG                                        | (-49,-57,28)      | 0.0498                      | 0.0792 | 10.2365***                 | 0.5786                     |
| Left SMG                                       | (-56,-43,31)      | 0.0584                      | 0.0613 | 16.8520***                 | 0.8870                     |
| Left IFG                                       | (-53,27,16)       | 0.0543                      | 0.0669 | 13.3027***                 | 0.7519                     |
| Left ITG                                       | (-61,-33,-15)     | 0.0248                      | 0.0447 | 8.2087***                  | 0.4640                     |
| STS ROIs from Neurosynth                       |                   |                             |        |                            |                            |
| Left aSTS                                      | (-54,9,-20)       | 0.0409                      | 0.0561 | 11.6259***                 | 0.6571                     |
| Left mSTS                                      | (-53,-18,-10)     | 0.0494                      | 0.0697 | 11.5142***                 | 0.6508                     |
| Left pSTS                                      | (-52,-40,5)       | 0.0751                      | 0.0745 | 16.8660***                 | 0.9533                     |
| <b>Attention ROIs</b>                          |                   |                             |        |                            |                            |
| Vogel et al. (2012)                            |                   |                             |        |                            |                            |
| Left FEF                                       | (-26,-5,50)       | 0.0790                      | 0.0541 | 24.4984***                 | 1.3847                     |
| Left MT+                                       | (-45,-71,-1)      | 0.1717                      | 0.0937 | 31.6751***                 | 1.7904                     |
| Left aIPS                                      | (-25,-62,51)      | 0.1415                      | 0.0785 | 30.9776***                 | 1.7510                     |
| Left pIPS                                      | (-25,-69,34)      | 0.1492                      | 0.0828 | 31.0145***                 | 1.7530                     |
| Swisher et al., (2007)                         |                   |                             |        |                            |                            |
| IPS1                                           |                   | 0.1351                      | 0.0827 | 28.0192***                 | 1.5837                     |
| IPS2                                           |                   | 0.1248                      | 0.0756 | 28.2508***                 | 1.5968                     |
| IPS3                                           |                   | 0.1246                      | 0.0744 | 28.6591***                 | 1.6199                     |
| IPS4                                           |                   | 0.0849                      | 0.0705 | 20.2942***                 | 1.1471                     |
| Network Comparison<br>(Language vs. Attention) |                   | $t(312) = -25.03, p < .001$ |        |                            |                            |

199  
 200 *Notes:* \*\*\* suggests that the beta values of connectivity link were significant by the one-sample t  
 201 test against zero at the level of  $p < .001$ .  
 202

203 **Supplementary Table 5.** Beta values of structural connectivity and resting-state functional  
 204 connectivity of VWFA with language ROIs based on Stevens et al. (2017).

|                                | Coordinates (MNI)     | Mean   | SD     | One-sample test<br>t-value | Effect Size<br>(Cohen's d) |
|--------------------------------|-----------------------|--------|--------|----------------------------|----------------------------|
| <b>Structural Connectivity</b> |                       |        |        |                            |                            |
| Broca's area                   | (-45,14.9,21.6)       | 0.0074 | 0.0124 | 4.8721***                  | 0.2754                     |
| Wernicke's area                | (-49.5,-40.4,26.26)   | 0.0006 | 0.0010 | -60.1241***                | -3.3984                    |
| Left Postcentral               | (-57.43,-11.06,45.76) | 0.0005 | 0.0019 | -32.7102***                | -1.8489                    |
| <b>Functional Connectivity</b> |                       |        |        |                            |                            |
| Broca's area                   | (-45,14.9,21.6)       | 0.0785 | 0.0674 | 19.5500***                 | 1.1050                     |
| Wernicke's area                | (-49.5,-40.4,26.26)   | 0.0656 | 0.0543 | 20.0623***                 | 1.1340                     |
| Left Postcentral               | (-57.43,-11.06,45.76) | 0.1072 | 0.1085 | 16.8301***                 | 0.9513                     |

205  
 206 *Notes:* \*\*\* suggests that the beta values of connectivity link were significant by the one-sample t  
 207 test at the level of  $p < .001$ .  
 208

209 **Supplementary Table 6.** Beta values of structural connectivity and resting-state functional  
 210 connectivity of VWFA with ROIs in anterior temporal lobe (ATL).

|                                | Coordinates (MNI) | Mean   | SD     | One-sample test<br>t-value | Effect Size<br>(Cohen's d) |
|--------------------------------|-------------------|--------|--------|----------------------------|----------------------------|
| <b>Structural Connectivity</b> |                   |        |        |                            |                            |
| ATL (Woollams et al., 2017)    | (-53,13,-32)      | 0.0215 | 0.0247 | 12.5582***                 | 0.7098                     |
| sATL (Hoffman et al., 2015)    | (-54,6,-22)       | 0.0168 | 0.0212 | 10.6502***                 | 0.6020                     |
| vATL (Hoffman et al., 2015)    | (-42,-14,-34)     | 0.0714 | 0.0468 | 25.4349***                 | 1.4377                     |
| vATL (Visser et al., 2011)     | (-44,-38,40)      | 0.3264 | 0.0924 | 61.6977***                 | 3.4874                     |
| <b>Functional Connectivity</b> |                   |        |        |                            |                            |
| ATL (Woollams et al., 2017)    | (-53,13,-32)      | 0.0277 | 0.0491 | 8.5279***                  | 0.4820                     |
| sATL (Hoffman et al., 2015)    | (-54,6,-22)       | 0.0420 | 0.0592 | 11.3337***                 | 0.6406                     |
| vATL (Hoffman et al., 2015)    | (-42,-14,-34)     | 0.0295 | 0.0413 | 10.9207***                 | 0.6173                     |
| vATL (Visser et al., 2011)     | (-44,-38,40)      | 0.3919 | 0.0767 | 89.4633***                 | 5.0568                     |

211  
 212 *Notes:* \*\*\* suggests that the beta values of connectivity link were significant by the one-sample t  
 213 test at the level of  $p < .001$ .

214  
 215

216 **Supplementary Table 7.** Comparison of beta values of structural connectivity and resting-state  
 217 functional connectivity of VWFA with two SMG ROIs.

|                                | Coordinates (MNI) | Mean   | SD     | One-sample test<br>t-value | Effect Size<br>(Cohen's d) |
|--------------------------------|-------------------|--------|--------|----------------------------|----------------------------|
| <b>Structural Connectivity</b> |                   |        |        |                            |                            |
| SMG (Vogel et al, 2012)        | (-56,-43,31)      | 0.0004 | 0.0007 | -98.1536***                | -5.5480                    |
| SMG (Neurosynth)               | (-44,-38,40)      | 0.0038 | 0.0073 | -0.4729                    | -0.0267                    |
| <b>Functional Connectivity</b> |                   |        |        |                            |                            |
| SMG (Vogel et al, 2012)        | (-56,-43,31)      | 0.0584 | 0.0613 | 16.8520***                 | 0.8870                     |
| SMG (Neurosynth)               | (-44,-38,40)      | 0.1045 | 0.0734 | 24.2318***                 | 1.3697                     |

218  
 219 *Notes:* \*\*\* suggests that the beta values of connectivity link were significant by the one-sample t  
 220 test at the level of  $p < .001$ .  
 221

222 **Supplementary Table 8.** Multiple regression analysis of VWFA structural connectivity  
 223 predicting age-adjusted Picture Vocabulary scores.

|                              | Beta value | Std. Error | t-value | p-value              |
|------------------------------|------------|------------|---------|----------------------|
| Intercept                    | 109.096    | 1.553      | 70.235  | < .001***<br>0.003** |
| Gender (F=0)                 | 4.98       | 1.672      | 2.979   |                      |
| Functional Connectivity (FC) |            |            |         |                      |
| Left aSTS                    | 15.172     | 22.238     | 0.682   | 0.496                |
| Left mSTS                    | 9.831      | 19.076     | 0.515   | 0.607                |
| Left pSTS                    | -13.227    | 19.44      | -0.68   | 0.497                |
| Structural Connectivity (SC) |            |            |         |                      |
| Left aSTS                    | 144.659    | 71.278     | 2.03    | 0.043*               |
| Left mSTS                    | -95.006    | 41.792     | -2.273  | 0.024*               |
| Left pSTS                    | 306.86     | 121.845    | 2.518   | 0.012*               |

  

| Model Comparison               | R-square | F-value   | Effect Size | Bayes Factor  |
|--------------------------------|----------|-----------|-------------|---------------|
| 1 Baseline (1 + Gender)        | 0.037    | 11.810*** | 0.038       | 33.106        |
| 2 Functional (1 + Gender + FC) | 0.039    | 3.130*    | 0.041       | 0.279         |
| 3 Structural (1 + Gender + SC) | 0.068    | 5.556***  | 0.072       | <b>20.859</b> |
| 4 Full ( 1 + Gender + FC + SC) | 0.071    | 3.299**   | 0.076       | 0.717         |

224  
 225 *Notes:* \* < .05; \*\* < .01; \*\*\* <.001; # <.10. Bolded numbers highlighted the large Bayes Factor  
 226 for detecting a small effect.

227  
 228  
 229

230 **Supplementary Table 9.** Multiple regression analysis of VWFA structural connectivity  
 231 predicting age-adjusted Word Reading scores.

|                                | Beta value | Std. Error | t-value     | p-value      |
|--------------------------------|------------|------------|-------------|--------------|
| Intercept                      | 106.835    | 1.529      | 69.876      | < .001***    |
| Gender (F=0)                   | 3.672      | 1.646      | 2.231       | 0.026*       |
| Functional Connectivity (FC)   |            |            |             |              |
| Left aSTS                      | -8.593     | 21.889     | -0.393      | 0.695        |
| Left mSTS                      | 14.727     | 18.776     | 0.784       | 0.434        |
| Left pSTS                      | 4.613      | 19.135     | 0.241       | 0.810        |
| Structural Connectivity (SC)   |            |            |             |              |
| Left aSTS                      | 62.346     | 70.159     | 0.889       | 0.375        |
| Left mSTS                      | -104.26    | 41.136     | -2.535      | 0.012*       |
| Left pSTS                      | 250.101    | 119.932    | 2.085       | 0.038*       |
| <hr/>                          |            |            |             |              |
| Model Comparison               | R-square   | F-value    | Effect Size | Bayes Factor |
| 1 Baseline (1 + Gender)        | 0.021      | 6.805**    | 0.022       | 3.198        |
| 2 Functional (1 + Gender + FC) | 0.028      | 2.174#     | 0.028       | 0.044        |
| 3 Structural (1 + Gender + SC) | 0.046      | 3.716**    | 0.048       | 0.721        |
| 4 Full ( 1 + Gender + FC + SC) | 0.051      | 2.345*     | 0.053       | 0.036        |

232  
 233 *Notes:* \* < .05; \*\* < .01; \*\*\* <.001; # <.10.  
 234



235 **Supplementary Table 10.** Multiple regression analysis of VWFA structural connectivity  
 236 predicting age-adjusted Flanker score.

|                                | Beta value | Std. Error | t-value     | p-value      |
|--------------------------------|------------|------------|-------------|--------------|
| Intercept                      | 95.425     | 2.204      | 43.303      | <.001***     |
| Gender (F=0)                   | 3.068      | 1.163      | 2.638       | 0.008**      |
| Functional Connectivity (FC)   |            |            |             |              |
| Left FEF                       | 15.024     | 14.586     | 1.03        | 0.74348      |
| Left MT+                       | 2.91       | 8.884      | 0.328       | 0.41018      |
| Left aIPS                      | 9.793      | 11.874     | 0.825       | 0.75599      |
| Left pIPS                      | -3.141     | 10.097     | -0.311      | 0.74348      |
| Structural Connectivity (SC)   |            |            |             |              |
| Left FEF                       | -106.055   | 32.402     | -3.273      | 0.001**      |
| Left MT+                       | 20.815     | 9.465      | 2.199       | 0.028*       |
| Left aIPS                      | -95.559    | 60.567     | -1.578      | 0.116        |
| Left pIPS                      | 38.406     | 19.694     | 1.95        | 0.052#       |
| <hr/>                          |            |            |             |              |
| Model Comparison               | R-square   | F-value    | Effect Size | Bayes Factor |
| 1 Baseline (1 + Gender)        | 0.016      | 3.645#     | 0.012       | 0.720        |
| 2 Functional (1 + Gender + FC) | 0.021      | 1.307      | 0.021       | 0.004        |
| 3 Structural (1 + Gender + SC) | 0.070      | 4.619***   | 0.075       | <b>5.731</b> |
| 4 Full ( 1 + Gender + FC + SC) | 0.090      | 3.324***   | 0.099       | 0.886        |

237  
 238 *Notes:* \* < .05; \*\* < .01; \*\*\* <.001; # <.10. Bolded numbers highlighted the large Bayes Factor  
 239 for detecting a small effect.  
 240

241 **Supplementary Table 11.** Multiple regression analysis of VWFA intrinsic functional  
 242 connectivity predicting age-adjusted Picture Vocabulary score.

|                                     | Beta value | Std. Error | t-value     | p-value      |
|-------------------------------------|------------|------------|-------------|--------------|
| Intercept                           | 115.092    | 6.104      | 18.856      | <.001***     |
| Gender (F=0)                        | 4.95       | 1.728      | 2.865       | 0.004**      |
| <b>Functional Connectivity (FC)</b> |            |            |             |              |
| ATL (Woollams et al., 2017)         | -63.194    | 26.441     | -2.39       | 0.017*       |
| sATL (Hoffman et al., 2015)         | 60.109     | 22.532     | 2.668       | 0.008**      |
| vATL (Hoffman et al., 2015)         | 7.159      | 24.255     | 0.295       | 0.768        |
| vATL (Visser et al., 2011)          | -19.582    | 13.169     | -1.487      | 0.138        |
| <b>Structural Connectivity (SC)</b> |            |            |             |              |
| ATL (Woollams et al., 2017)         | 21.662     | 46.1       | 0.47        | 0.639        |
| sATL (Hoffman et al., 2015)         | 24.292     | 51.868     | 0.468       | 0.640        |
| vATL (Hoffman et al., 2015)         | 11.519     | 20.683     | 0.557       | 0.578        |
| vATL (Visser et al., 2011)          | -1.358     | 9.179      | -0.148      | 0.882        |
| <hr/>                               |            |            |             |              |
| Model Comparison                    | R-square   | F-value    | Effect Size | Bayes Factor |
| 1 Baseline (1 + Gender)             | 0.037      | 11.810***  | 0.038       | 33.106       |
| 2 Functional (1 + Gender + FC)      | 0.0637     | 4.162**    | 0.068       | <b>2.896</b> |
| 3 Structural (1 + Gender + SC)      | 0.0437     | 2.794*     | 0.046       | 0.147        |
| 4 Full ( 1 + Gender + FC + SC)      | 0.0714     | 2.578**    | 0.077       | 0.097        |

243  
 244 *Notes:* \* < .05; \*\* < .01; \*\*\* <.001; # <.10. Bolded numbers highlighted the large Bayes Factor  
 245 for detecting a small effect.  
 246  
 247

248 **Supplementary Table 12.** VWFA functional connectivity with language and attention network  
 249 nodes during the rhyming task.  
 250

| Target ROIs              | Mean (SD)   | t-value | Uncoorr. p-value | FDR adjusted p-value |
|--------------------------|-------------|---------|------------------|----------------------|
| <b>Language ROIs</b>     |             |         |                  |                      |
| Vogel et al. 2012        |             |         |                  |                      |
| Left IFG                 | 0.31 (0.36) | 3.09    | 0.009            | 0.017*               |
| Left ITG                 | 0.11 (0.39) | 1.04    | 0.320            | 0.358                |
| Left AG                  | 0.09 (0.33) | 1.03    | 0.325            | 0.358                |
| Left SMG                 | 0.26 (0.24) | 3.92    | 0.002            | 0.007**              |
| STS ROIs from Neurosynth |             |         |                  |                      |
| Left aSTS                | 0.09 (0.37) | 0.87    | 0.401            | 0.401                |
| Left mSTS                | 0.28 (0.35) | 2.92    | 0.013            | 0.020*               |
| Left pSTS                | 0.39 (0.27) | 5.14    | <.001            | 0.001**              |
| <b>Attention ROIs</b>    |             |         |                  |                      |
| Vogel et al. 2012        |             |         |                  |                      |
| Left FEF                 | 0.21 (0.33) | 2.35    | 0.037            | 0.051#               |
| Left MT+                 | 0.32 (0.32) | 3.61    | 0.004            | 0.008**              |
| Left aIPS                | 0.29 (0.19) | 5.58    | <.001            | 0.001**              |
| Left pIPS                | 0.35 (0.34) | 3.78    | 0.003            | 0.007**              |

251  
 252 *Notes:* \* < .05; \*\* < .01; \*\*\* <.001; # <.10 for the FDR corrected p values.  
 253

254 **Supplementary Table 13.** VWFA functional connectivity with language and attention network  
 255 nodes during the flanker task.  
 256

| Target ROIs              | Mean (SD)   | t-value | Uncoorr. p-value | FDR adjusted p-value |
|--------------------------|-------------|---------|------------------|----------------------|
| <b>Language ROIs</b>     |             |         |                  |                      |
| Vogel et al. 2012        |             |         |                  |                      |
| Left IFG                 | 0.19 (0.35) | 2.75    | 0.011            | 0.019*               |
| Left ITG                 | 0.08 (0.46) | 0.9     | 0.379            | 0.379                |
| Left AG                  | 0.10 (0.45) | 1.18    | 0.25             | 0.274                |
| Left SMG                 | 0.34 (0.48) | 3.61    | 0.001            | 0.003**              |
| STS ROIs from Neurosynth |             |         |                  |                      |
| Left aSTS                | 0.21 (0.4)  | 2.7     | 0.012            | 0.019*               |
| Left mSTS                | 0.17 (0.37) | 2.39    | 0.025            | 0.034*               |
| Left pSTS                | 0.18 (0.43) | 2.09    | 0.047            | 0.057#               |
| <b>Attention ROIs</b>    |             |         |                  |                      |
| Vogel et al. 2012        |             |         |                  |                      |
| Left FEF                 | 0.34 (0.41) | 4.19    | <.001            | 0.001**              |
| Left MTplus              | 0.32 (0.39) | 4.2     | <.001            | 0.001**              |
| Left aIPS                | 0.43 (0.43) | 5.07    | <.001            | <.001***             |
| Left pIPS                | 0.37 (0.27) | 7.07    | <.001            | <.001***             |

257  
 258 *Notes:* \* < .05; \*\* < .01; \*\*\* <.001; # <.10 for the FDR corrected p values.  
 259  
 260  
 261  
 262

263 **Supplementary Table 14.** Comparison of the GAM and GLM results for the brain-behavior  
264 relationship.

|                    | Additional R <sup>2</sup> explained by GAM | Chi-square value (deviance test of GAM over GLM) |
|--------------------|--------------------------------------------|--------------------------------------------------|
| Picture Vocabulary | 0.017                                      | 9.639*                                           |
| Word Reading       | 0.002                                      | 3.680                                            |
| Flanker Task       | 0.068                                      | 43.798**                                         |

265  
266 *Notes:* \* <.05; \*\* <.01. GAM = General Additive Model; GLM = General Linear Model.  
267 Compared to the GLM, the nonparametric GAM analysis explained an additional 1.7% ~ 6.8%  
268 variance on the Picture Vocabulary and Flanker Tasks.

269  
270  
271

272 **Supplementary Table 15.** Spearman correlation of predicted scores from structural connectivity  
273 and actual scores of behavioral measures.  
274

|                               | Picture Vocabulary | Word Reading  | Flanker Task   |
|-------------------------------|--------------------|---------------|----------------|
| VWFA-STs circuitry            | <b>0.16**</b>      | <b>0.16**</b> | 0.01           |
| VWFA-frontoparietal circuitry | 0.10#              | 0.05          | <b>0.20***</b> |

275  
276 *Notes:* \*\* <.01, \*\*\*<.001, #<.10.  
277  
278  
279

280 **Supplementary References**

- 281
- 282 1. Mennes, M. *et al.* Inter-individual differences in resting-state functional connectivity  
283 predict task-induced BOLD activity. *Neuroimage* **50**, 1690–1701 (2010).
- 284 2. Mennes, M. *et al.* Linking inter-individual differences in neural activation and behavior to  
285 intrinsic brain dynamics. *Neuroimage* **54**, 2950–2959 (2011).
- 286 3. Clare Kelly, A. M., Uddin, L. Q., Biswal, B. B., Castellanos, F. X. & Milham, M. P.  
287 Competition between functional brain networks mediates behavioral variability.  
288 *Neuroimage* **39**, 527–537 (2008).
- 289 4. Ashburner, J. *et al.* SPM12 Manual (The FIL Methods Group) . *Funct. Imaging Lab.*  
290 (2013). doi:10.1111/j.1365-294X.2006.02813.x
- 291 5. Eklund, A., Nichols, T. E. & Knutsson, H. Cluster failure: Why fMRI inferences for  
292 spatial extent have inflated false-positive rates. *Proc. Natl. Acad. Sci. U. S. A.* (2016).  
293 doi:10.1073/pnas.1602413113
- 294 6. McLaren, D. G., Ries, M. L., Xu, G. & Johnson, S. C. A generalized form of context-  
295 dependent psychophysiological interactions (gPPI): A comparison to standard approaches.  
296 *Neuroimage* (2012). doi:10.1016/j.neuroimage.2012.03.068
- 297 7. Binder, J. R., Desai, R. H., Graves, W. W. & Conant, L. L. Where Is the Semantic System?  
298 A Critical Review and Meta-Analysis of 120 Functional Neuroimaging Studies. *Cereb.*  
299 *Cortex* **19**, 2767–2796 (2009).
- 300 8. Stevens, W. D., Kravitz, D. J., Peng, C. S., Henry Tessler, M. & Martin, A. Privileged  
301 Functional Connectivity Between the Visual Word Form Area and the Language System.  
302 *J. Neurosci.* **37**, 0138–17 (2017).
- 303 9. McCandliss, B. D., Cohen, L. & Dehaene, S. The visual word form area: Expertise for  
304 reading in the fusiform gyrus. *Trends Cogn. Sci.* **7**, 293–299 (2003).
- 305 10. Swisher, J. D., Halko, M. A., Merabet, L. B., McMains, S. A. & Somers, D. C. Visual  
306 Topography of Human Intraparietal Sulcus. *J. Neurosci.* **27**, 5326–5337 (2007).
- 307 11. Vogel, A. C., Miezin, F. M., Petersen, S. E. & Schlaggar, B. L. The putative visual word  
308 form area is functionally connected to the dorsal attention network. *Cereb. Cortex* **22**,  
309 537–549 (2012).
- 310 12. Gao, W. & Lin, W. Frontal Parietal Control Network Regulates the Anti-Correlated  
311 Default and Dorsal Attention Networks. *Hum. Brain Mapp.* **33**, 192–202 (2012).
- 312 13. Xue, G., Chen, C., Jin, Z. & Dong, Q. Language experience shapes fusiform activation  
313 when processing a logographic artificial language: an fMRI training study. *Neuroimage* **31**,  
314 1315–1326 (2006).
- 315 14. Price, C. J. & Devlin, J. T. The myth of the visual word form area. *Neuroimage* **19**, 473–  
316 481 (2003).
- 317 15. Dundas, E. M., Plaut, D. C. & Behrmann, M. The joint development of hemispheric

- 318 lateralization for words and faces. *J. Exp. Psychol. Gen.* **142**, 348–358 (2013).
- 319 16. Yeatman, J. D. *et al.* The vertical occipital fasciculus: A century of controversy resolved  
320 by in vivo measurements. *Proc. Natl. Acad. Sci.* 201418503 (2014).  
321 doi:10.1073/pnas.1418503111
- 322 17. Bullock, D. *et al.* Associative white matter connecting the dorsal and ventral posterior  
323 human cortex. *Brain Struct. Funct.* **224**, 2631–2660 (2019).

324

325

326

327
